# Supplementary material for: Bifidobacterial biofilm formation is a multifactorial adaptive phenomenon in response to bile exposure
Source: PubMed Central journal article supplement (PMC7360559; doi:10.1038/s41598-020-68179-9), 2020-07-14

Supplementary Figure S1: Transposon mutants with reduced biofilm formation  
in *Bifidobacterium breve* UCC2003.

Caption:

Summary of the eleven transposon mutants affected in biofilm formation found during a screen of a transposon mutant library of *B. breve* UCC2003. Black triangles indicate the location of the transposon insertion.

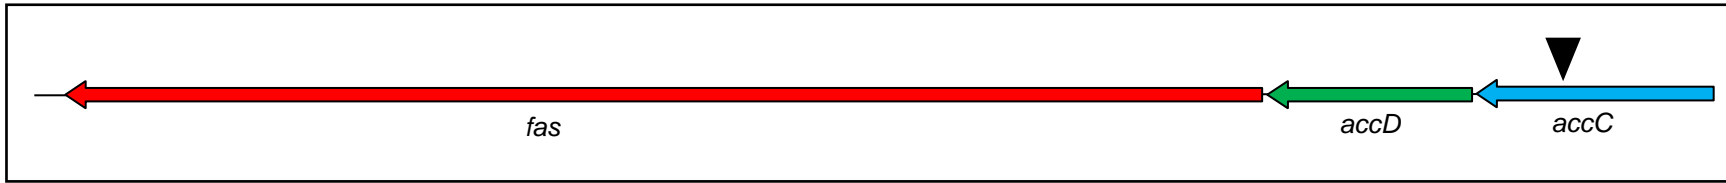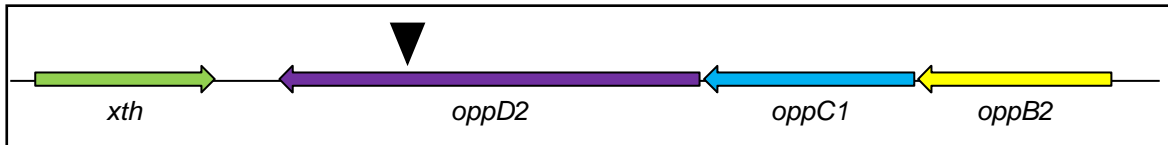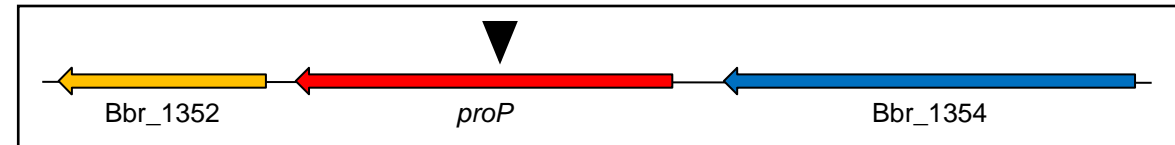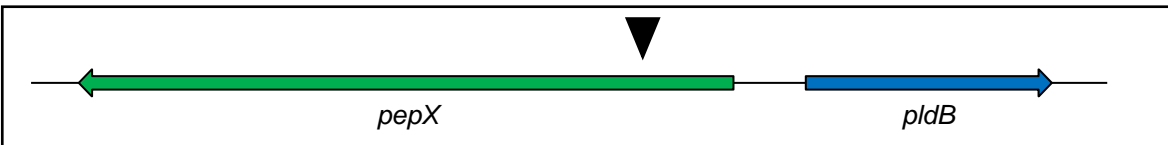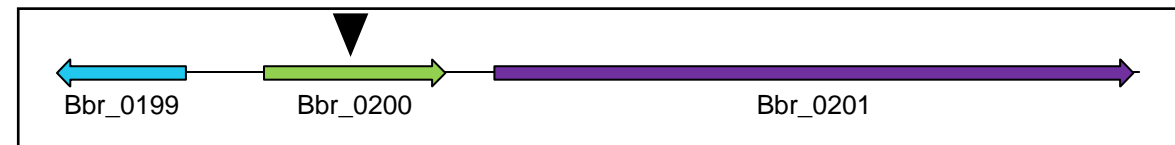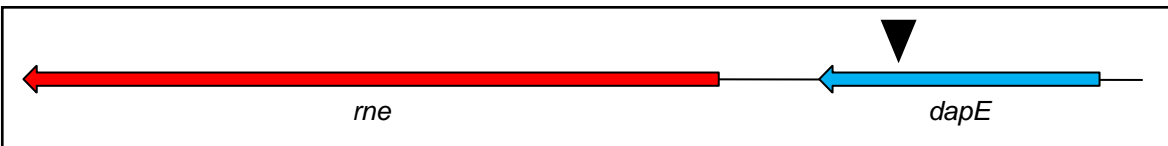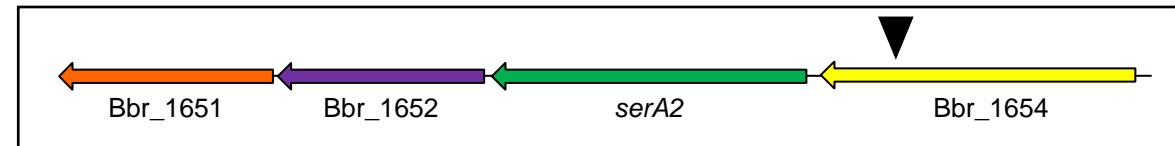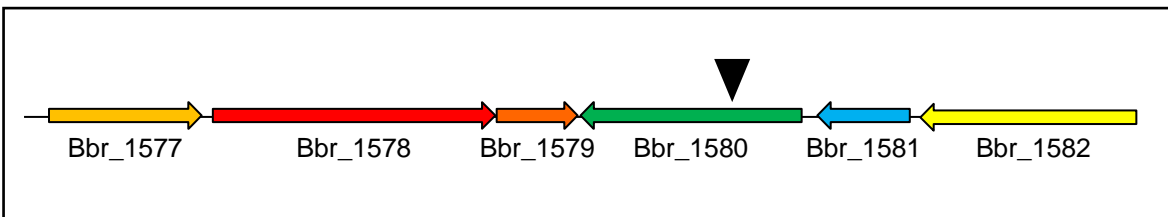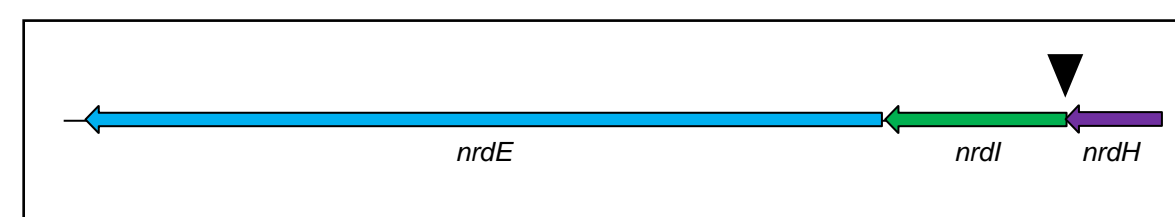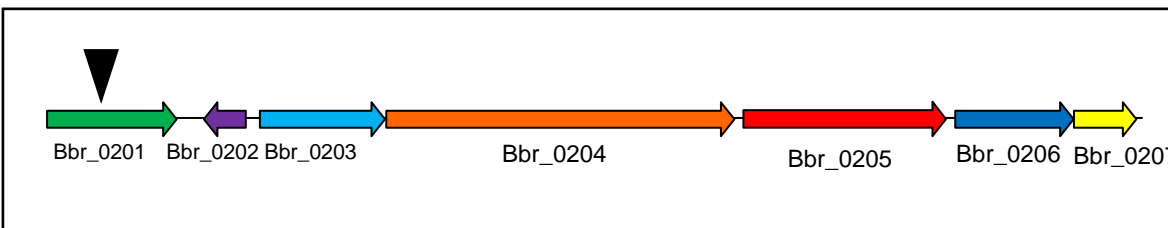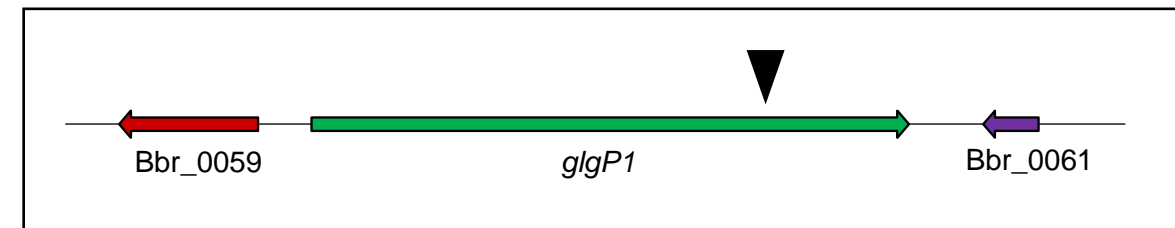

Supplement: 41598_2020_68179_MOESM1_ESM.pdf [file 41598_2020_68179_MOESM1_ESM.pdf]
